# Supplementary material for: A high-entropy cathode catalyst with multiphase catalytic capability of Li2O2 and Li2CO3 enabling ultralong cycle life in Li–air batteries
Source: Royal Society of Chemistry journal article supplement (doi:10.1039/d4ee02817a), 2024-01-01
Supplement: d4ee02817a1.pdf [file d4ee02817a1.pdf]

## Supporting Information

### High-entropy cathode catalyst with multiphase catalytic capability of $\text{Li}_2\text{O}_2$ and $\text{Li}_2\text{CO}_3$ enabling ultralong cycle life in Li-air batteries

Xia Li,<sup>a</sup> Guoliang Zhang,<sup>a</sup> Dongmei Zhang,<sup>a</sup> Ruonan Yang,<sup>a</sup> Han Yu,<sup>a</sup> Xiuqi Zhang,<sup>a</sup> Gang Lian,<sup>b</sup> Hua Hou,<sup>c</sup> Zhanhu Guo,<sup>d</sup> Chuanxin Hou,<sup>c</sup> Xiaoyang Yang,<sup>c</sup> and Feng Dang<sup>\*a</sup>

<sup>a</sup>Key Laboratory for Liquid-Solid Structure Evolution and Processing of Materials (Ministry of Education), School of Materials Science and Engineering, Shandong University, Jinan 250061, China

<sup>b</sup>State Key Laboratory of Crystal Materials, Shandong University, Jinan 250061, P. R. China

<sup>c</sup>Shanxi-Zheda Institute of Advanced Materials and Chemical Engineering, Taiyuan 030024, P. R. China

<sup>d</sup>Integrated Composites Lab, Department of Mechanical and Construction Engineering, Northumbria University, Newcastle Upon Tyne NE1 8ST, UK

<sup>e</sup>School of Environmental and Material Engineering, Yantai University, No.30 Qingquan Road, Yantai 264005, P. R. China

\*Corresponding author: dangfeng@sdu.edu.cn

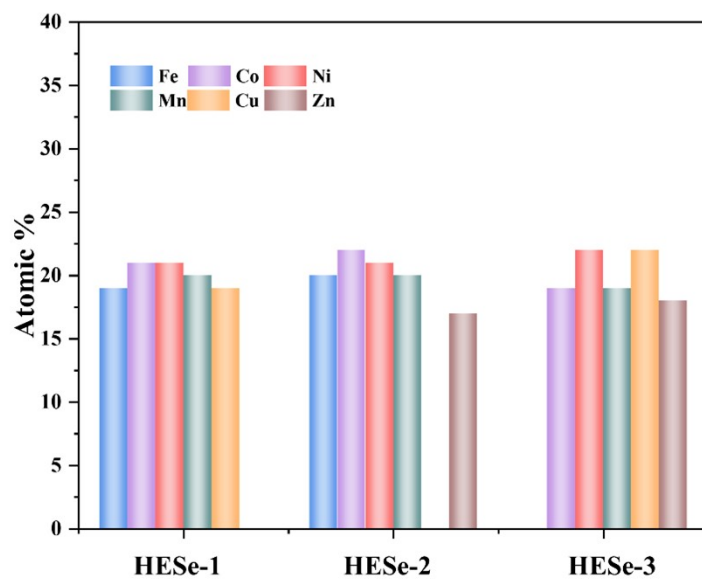

**Figure S1.** ICP-OES results for HESes

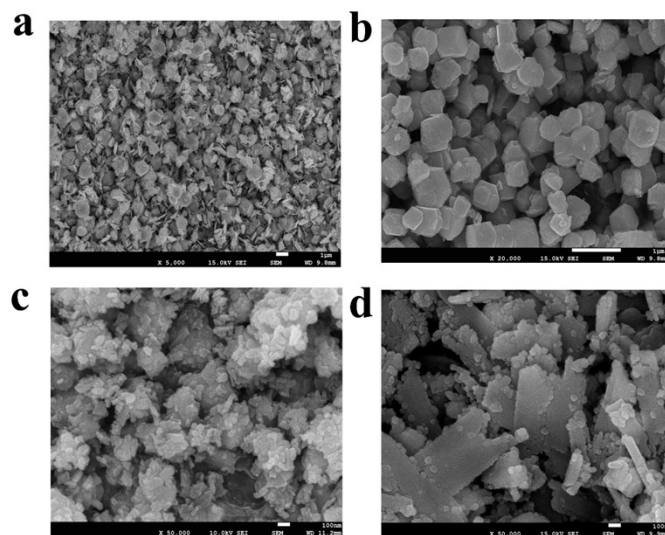

**Figure S2.** SEM images of a) (FeCoNi)Se<sub>2</sub>, b) (FeCoNiMn)Se<sub>2</sub>, c) HESe-1 and d) HESe-3

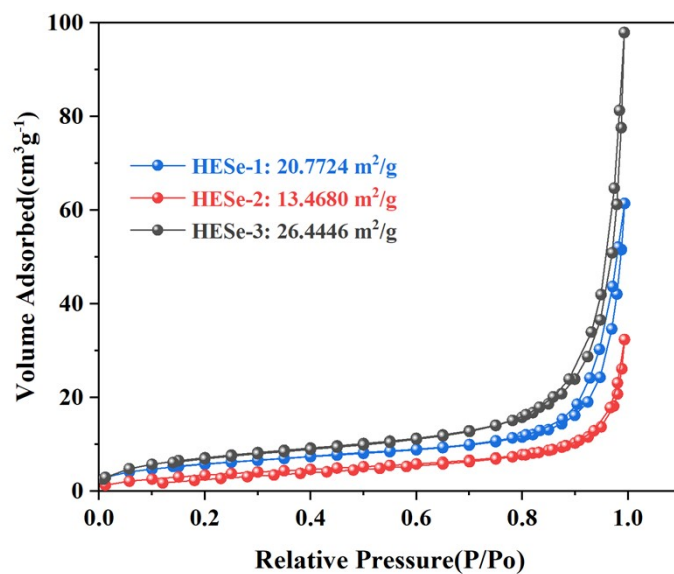

Figure S3. N<sub>2</sub> adsorption-desorption isotherms and pore size distribution profiles of HESe-1, HESe-2 and HESe-3.

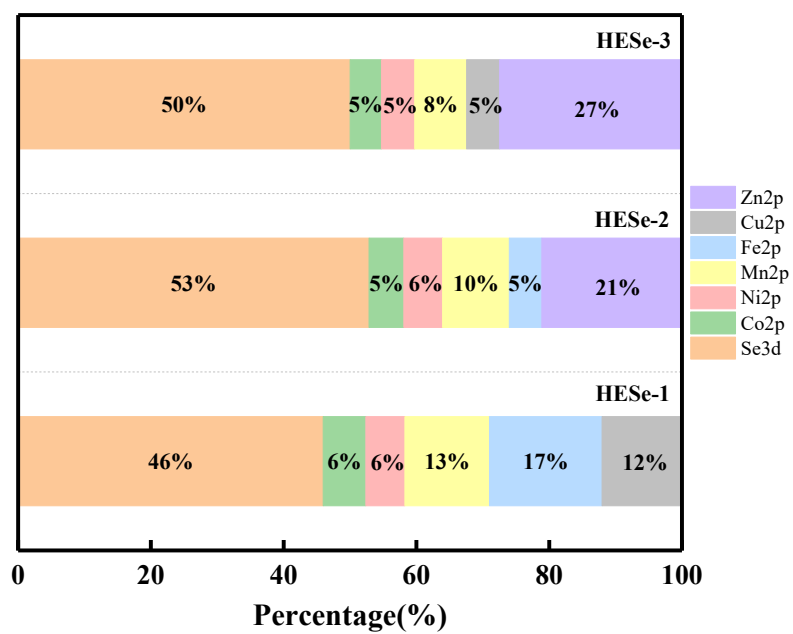

**Figure S4.** XPS survey spectra of the HESe samples with calculated metal atomic ratio

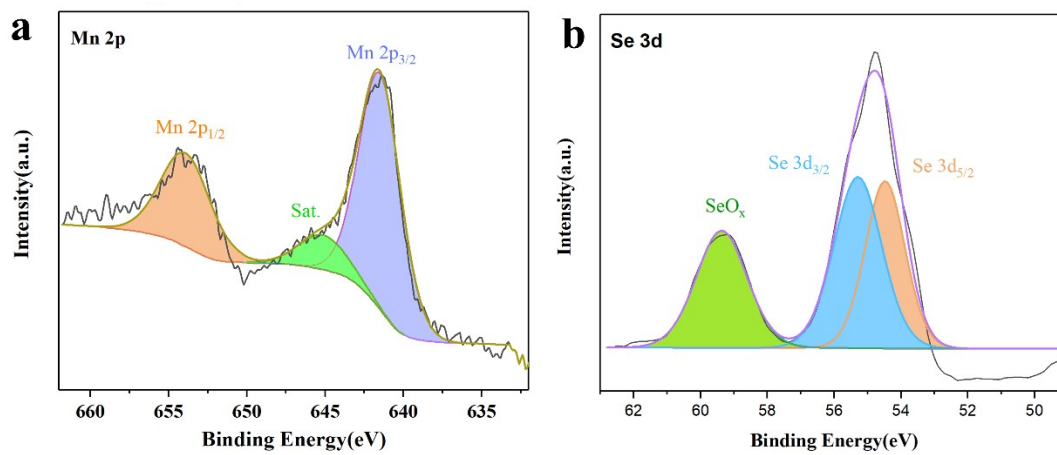

Figure S5. The XPS spectra of a) Mn b) Se in HESe-2.

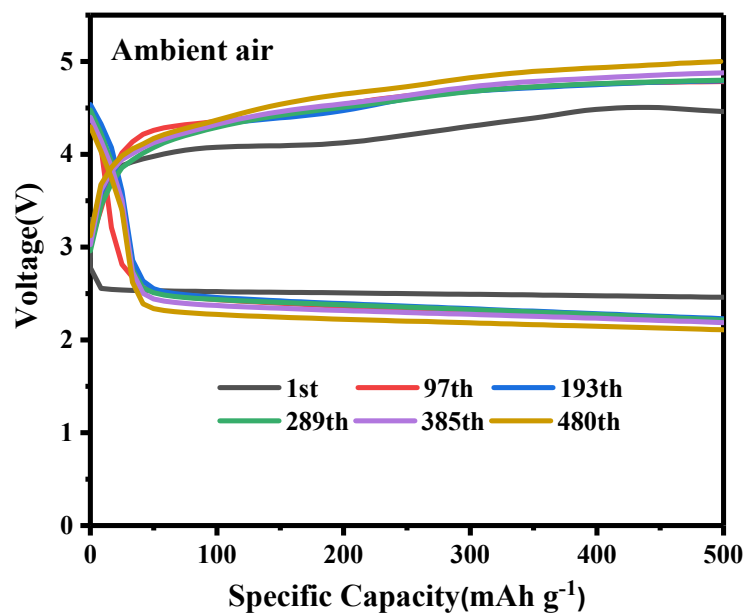

**Figure S6.** Cycling performances of HESe-2 cathode with selected typical discharge/charge profiles under a limited capacity of  $500 \text{ mA h g}^{-1}$  at  $500 \text{ mA g}^{-1}$  in LABs.

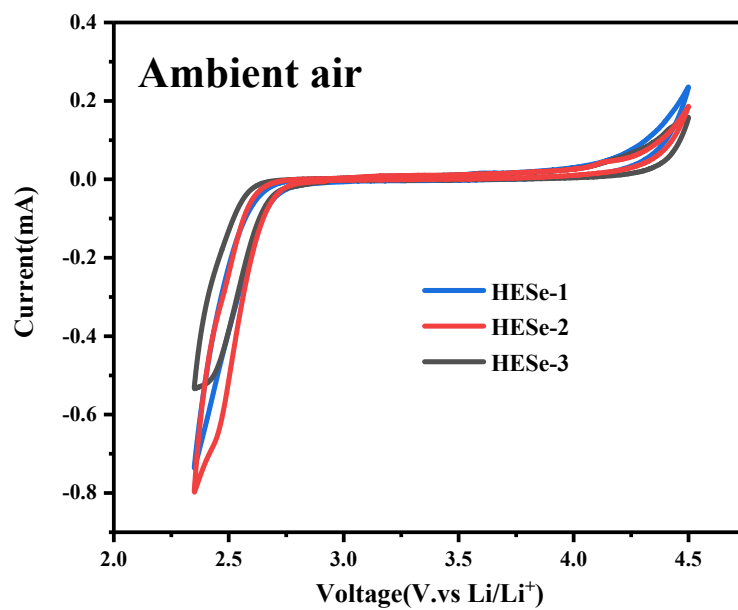

**Figure S7.** CV curves of the HESe cathodes under a scan rate of  $0.1 \text{ mV s}^{-1}$  with a voltage window of  $2.35 \sim 4.5$  V in ambient air



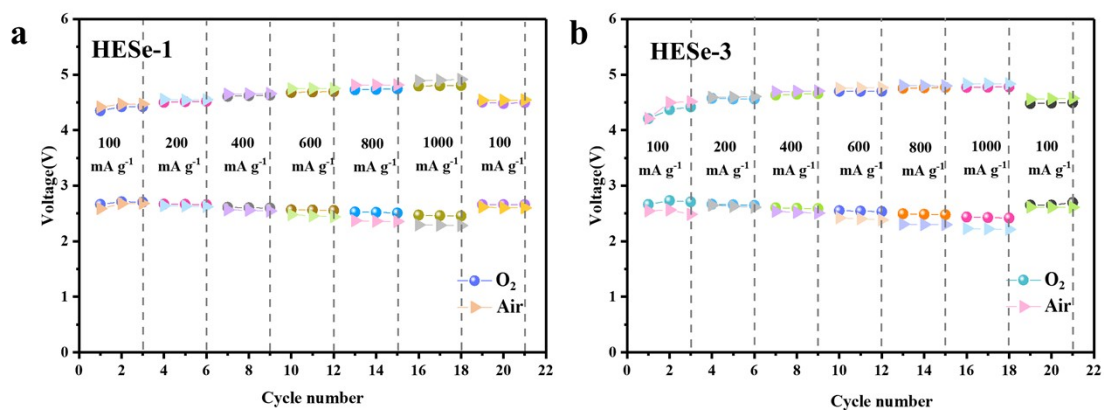

**Figure S8.** Rate performance of a) HESe-1 cathode and b) HESe-3 cathode at different current densities (100 to 1000 mA g<sup>-1</sup>) with a limited specific capacity 500 mAh g<sup>-1</sup> in O<sub>2</sub> and air.

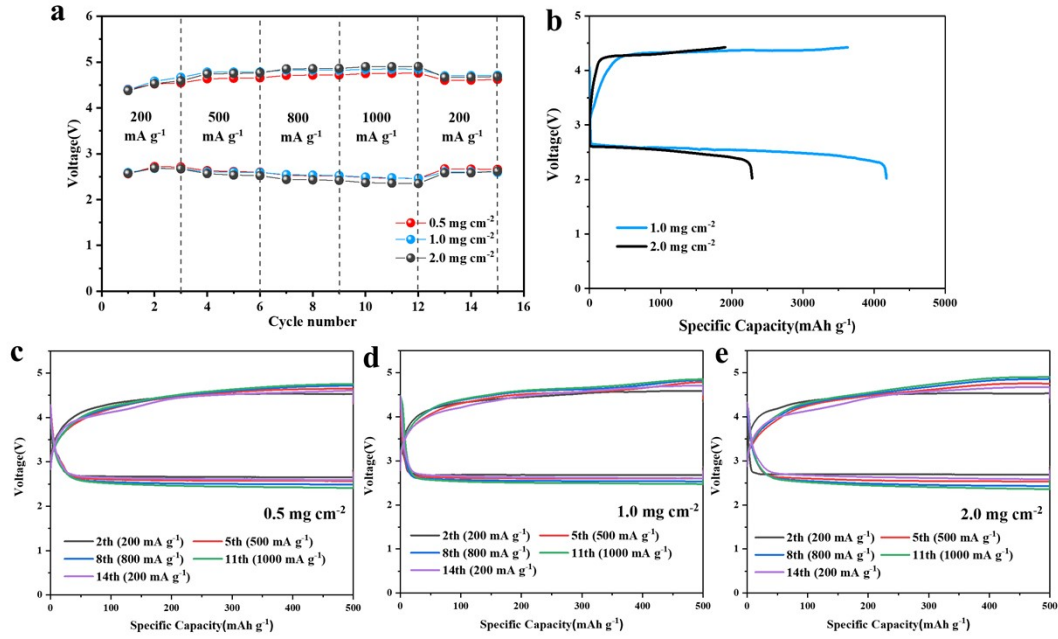

Figure S9. a) Rate performance of HESe-2 cathodes with different mass loadings at current densities (200 to 1000 mA g<sup>-1</sup>) with a limited specific capacity 500 mAh g<sup>-1</sup>; b) The initial discharge/charge profiles of HESe-2 cathodes with different mass loadings at 100 mA g<sup>-1</sup> with a voltage range from 2 to 4.5 V; c) Rate performance of HESe-2 cathodes with selected typical discharge/charge profiles under mass loadings of c) 0.5 mg cm<sup>-2</sup>, d) 1.0 mg cm<sup>-2</sup> and e) 2.0 mg cm<sup>-2</sup>.

As shown in Figure S9a and S9c-e, the HESe-2 cathode with the mass loading of 1.0 mg cm<sup>-2</sup> exhibited almost the same discharge potentials and higher charge potentials at the currents 200-1000 mA g<sup>-1</sup> and 500 mA h g<sup>-1</sup> when compared to those of the cathode with 0.5 mg cm<sup>-2</sup>. Meanwhile, the cathode with 2.0 mg cm<sup>-2</sup> exhibited higher discharge/charge overpotentials at the same test conditions. With a cutoff voltage window of 2-4.5 V at 100 mA g<sup>-1</sup>, HESe-2 cathode with 1.0 mg cm<sup>-2</sup> delivered larger discharge capacity of 4173.3 mA h g<sup>-1</sup> with a coulombic efficiency of 86.97% compared to the cathode with 0.5 mg cm<sup>-2</sup> (Figure 3c). For the cathode with 2.0 mg cm<sup>-2</sup>, the discharge capacity decreased to 2284.9 mA h g<sup>-1</sup> with the coulombic efficiency of 83.46% (Figure S9b).

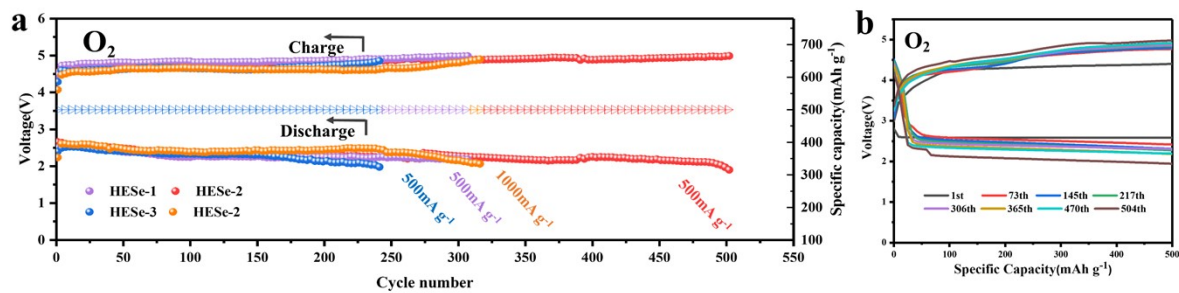

**Figure S10.** a) Cycling performances of HESe cathodes with terminal voltages at different current densities and fixed capacity 500 mAh g<sup>-1</sup> in LOBs; b) Cycling performances of HESe-2 cathode with selected typical discharge/charge profiles under a limited capacity of 500 mA h g<sup>-1</sup> at 500 mA g<sup>-1</sup> in LOBs.

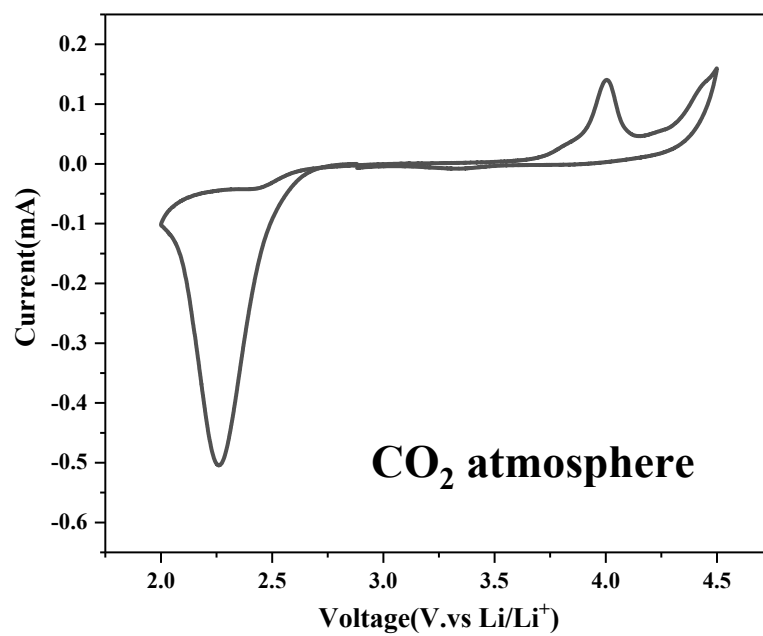

**Figure S11.** CV curve of the HESe cathode under a scan rate of  $0.1 \text{ mV s}^{-1}$  with a voltage window of 2.0 ~ 4.5 V in CO<sub>2</sub> atmosphere

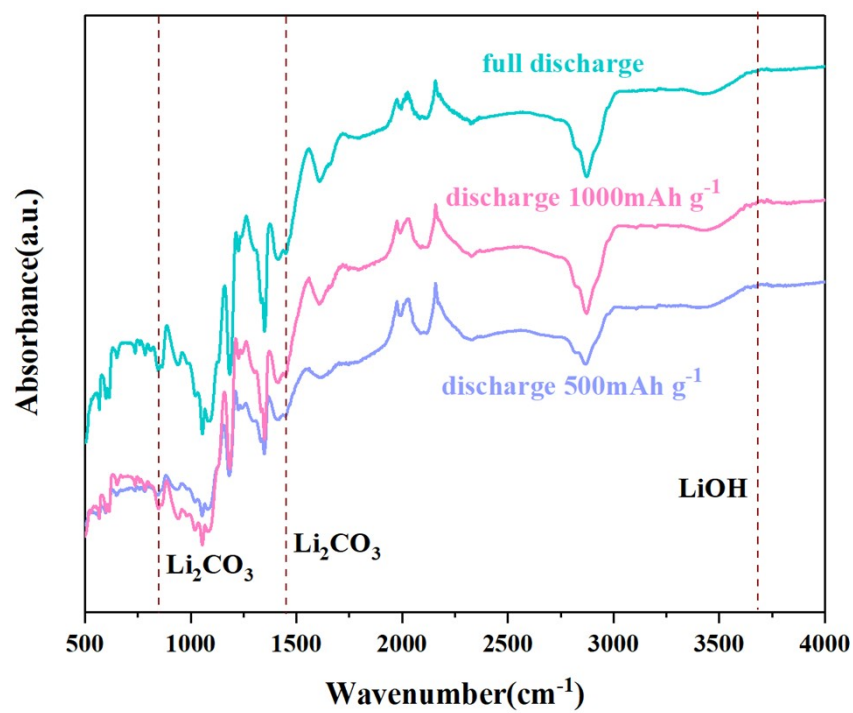

Figure S12. FTIR spectra of discharging to different capacities in ambient air

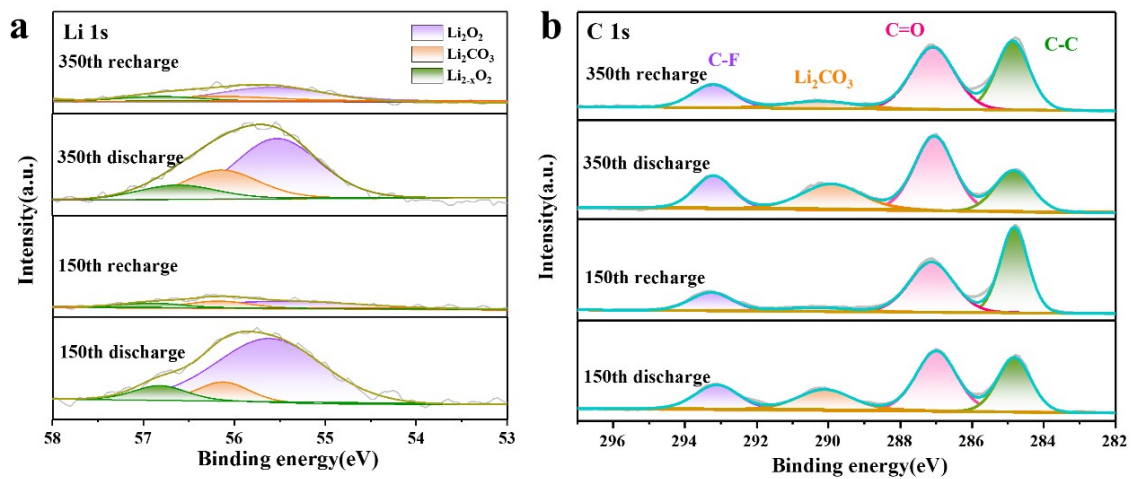

**Figure S13.** XPS spectra of a) Li 1s and b) C 1s of HESe electrode at different discharge/charge stages in ambient air.

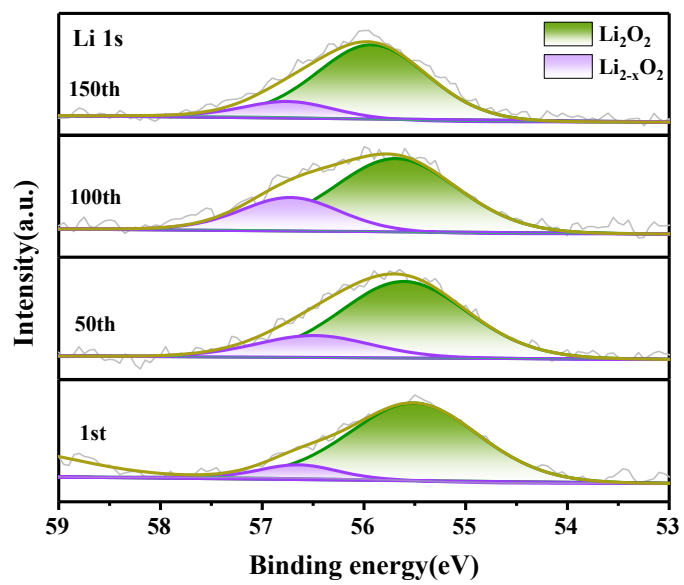

Figure S14. XPS spectra of Li 1s in  $\text{O}_2$

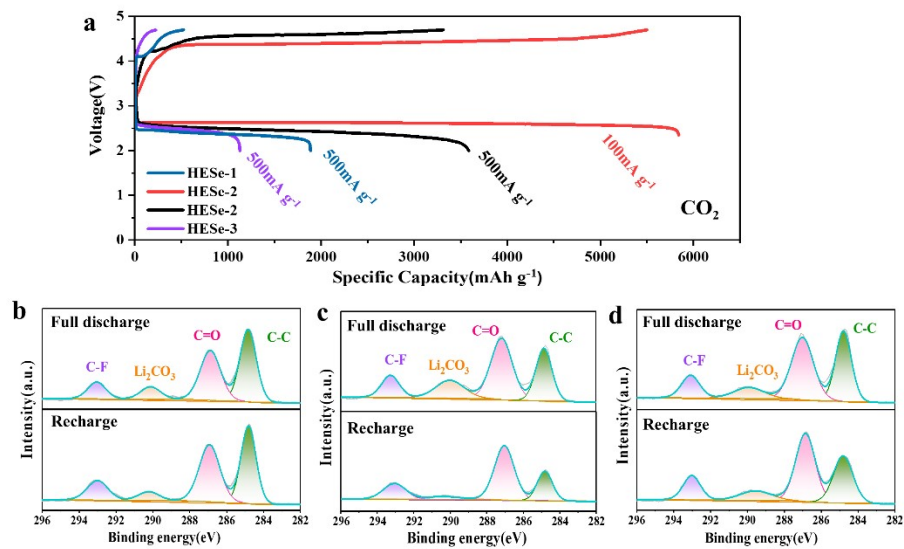

**Figure S15.** a) The discharge/charge profiles of HESe cathodes in LCBs; XPS spectra of C 1s in b) HESe-1, c) HESe-2 and d) HESe-3 in LCBs after full discharge and recharge at 500 mA g<sup>-1</sup>.



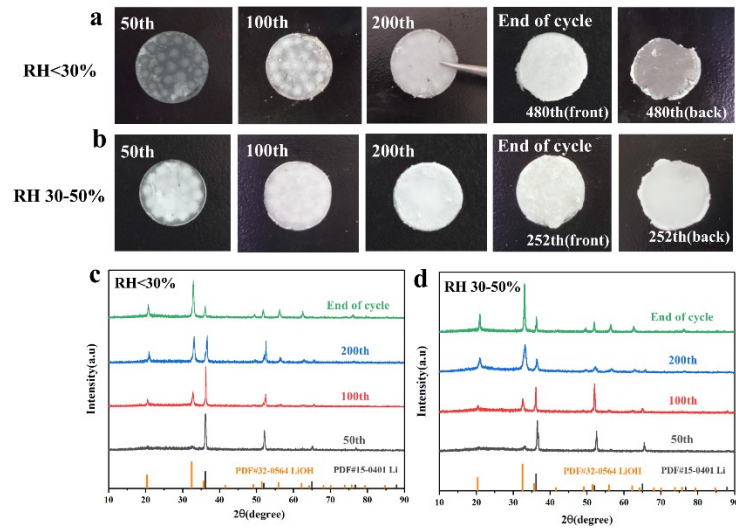

**Figure S16.** Li anode pictures at different cycles of a) low humidity (RH<30%) and b) high humidity (RH 30-50%); c) XRD patterns of Li anode during cycling under c) low humidity and d) high humidity.

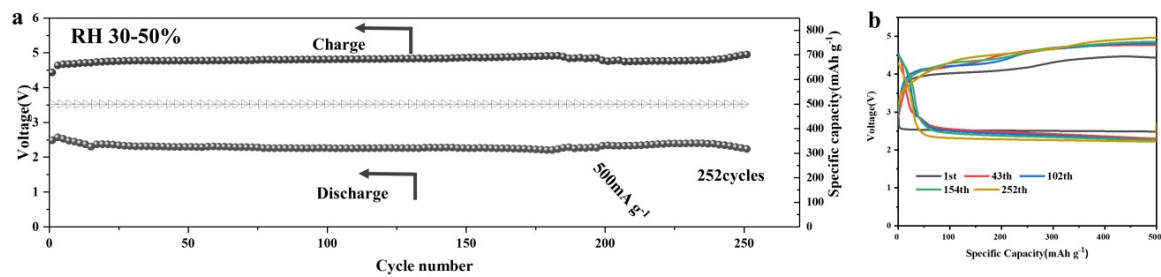

**Figure S17.** a) Cycling performance of HESe cathode with terminal voltages at 500 mA g<sup>-1</sup> and fixed capacity 500 mAh g<sup>-1</sup> in LABs at high humidity (RH 30-50%); b) Cycling performance of HESe cathode with selected typical discharge/charge profiles under a limited capacity of 500 mA h g<sup>-1</sup> at 500 mA g<sup>-1</sup>.

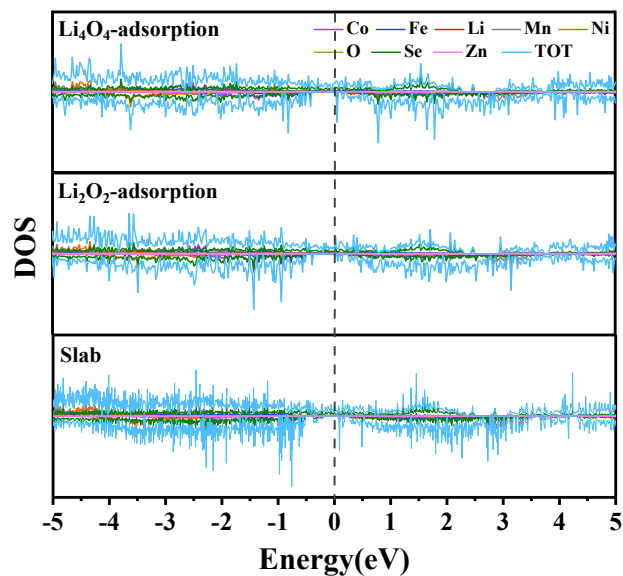

**Figure S18.** Density of states (DOS) of pristine, after adsorption of Li<sub>2</sub>O<sub>2</sub> groups and after adsorption of Li<sub>4</sub>O<sub>4</sub> groups.

The electronic states of the (210) facet at the Fermi level increased after the adsorption of discharge products (Li<sub>2</sub>O<sub>2</sub> and Li<sub>4</sub>O<sub>4</sub>), indicating the improved conductivity of the adsorbed system, in which the O 2p, Se 3d, and TM 3d orbitals contributed to the electronic states near the Fermi level to the growth of Li<sub>2</sub>O<sub>2</sub>, improving charge transfer efficiency and resulting in good catalytic durability.

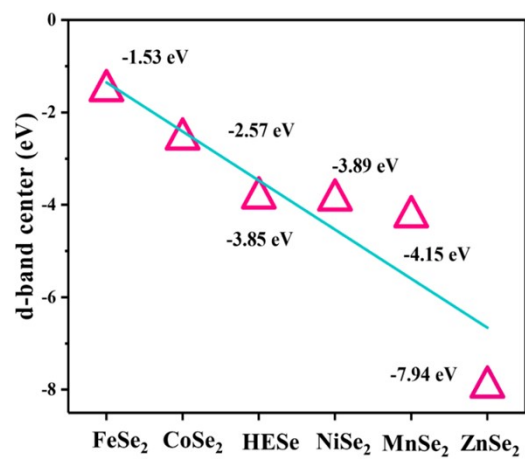

**Figure S19.** The d-band centers of FeSe<sub>2</sub>, CoSe<sub>2</sub>, HESe, NiSe<sub>2</sub>, MnSe<sub>2</sub> and ZnSe<sub>2</sub>.

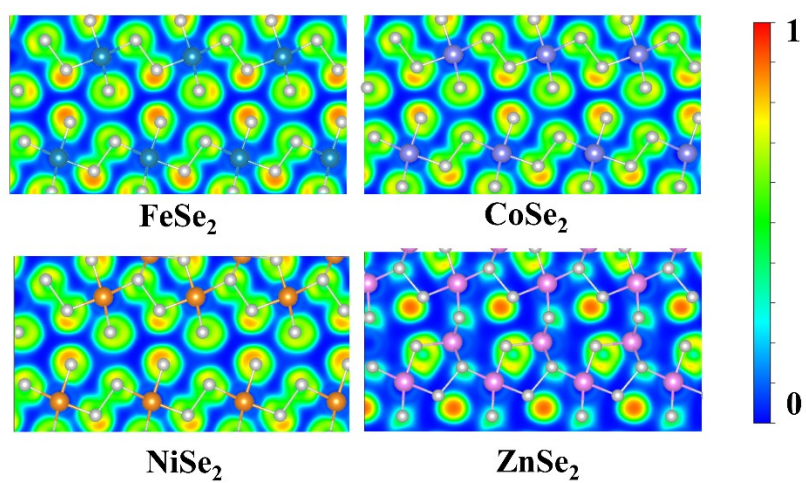

**Figure S20.** Electron localization function plots of  $\text{FeSe}_2$ ,  $\text{CoSe}_2$ ,  $\text{NiSe}_2$  and  $\text{ZnSe}_2$ , respectively

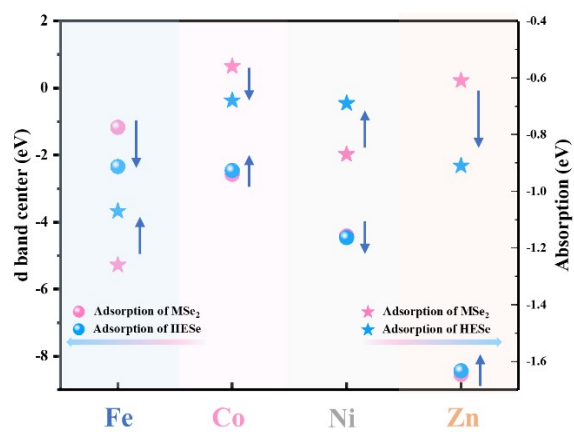

**Figure S21.** The relationship between d-band center and adsorption energy of different metal sites in MSe<sub>2</sub> and HSE

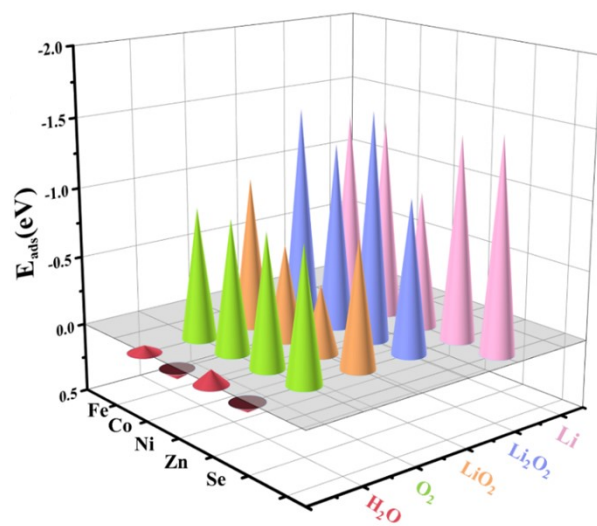

Figure S22. Adsorption energy of different reaction species on Fe, Co, Ni, Zn and Se sites.

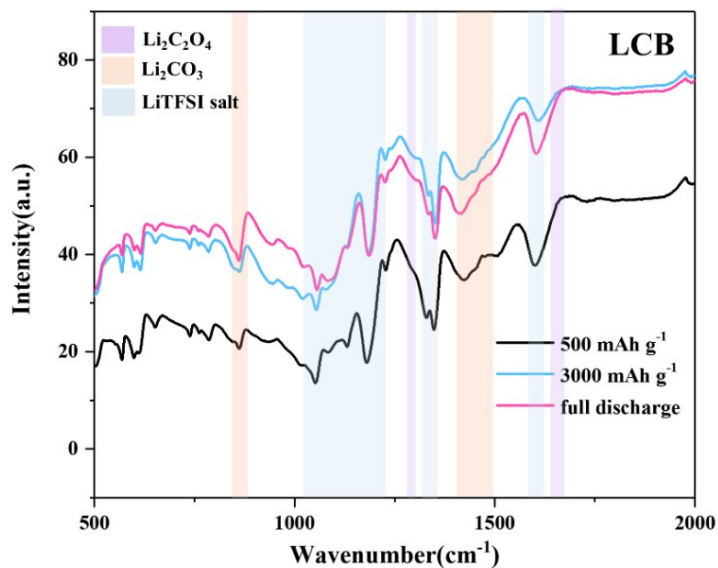

**Figure S23.** FTIR spectra of the HESe electrode at different capacities during discharge in LCB. Figure S17 shows the FT-IR spectra tested in CO<sub>2</sub>. No intermediate Li<sub>2</sub>C<sub>2</sub>O<sub>4</sub> is observed in the discharge products of Li-CO<sub>2</sub> batteries (1318, 1642 cm<sup>-1</sup>).<sup>1</sup> The LiTFSI/TEGDME electrolyte typical peaks were found at 1040 to 1350 cm<sup>-1</sup>.<sup>2</sup> Besides, the peaks at 1441, 1500 cm<sup>-1</sup> can be attributed to Li<sub>2</sub>CO<sub>3</sub>.<sup>3</sup>

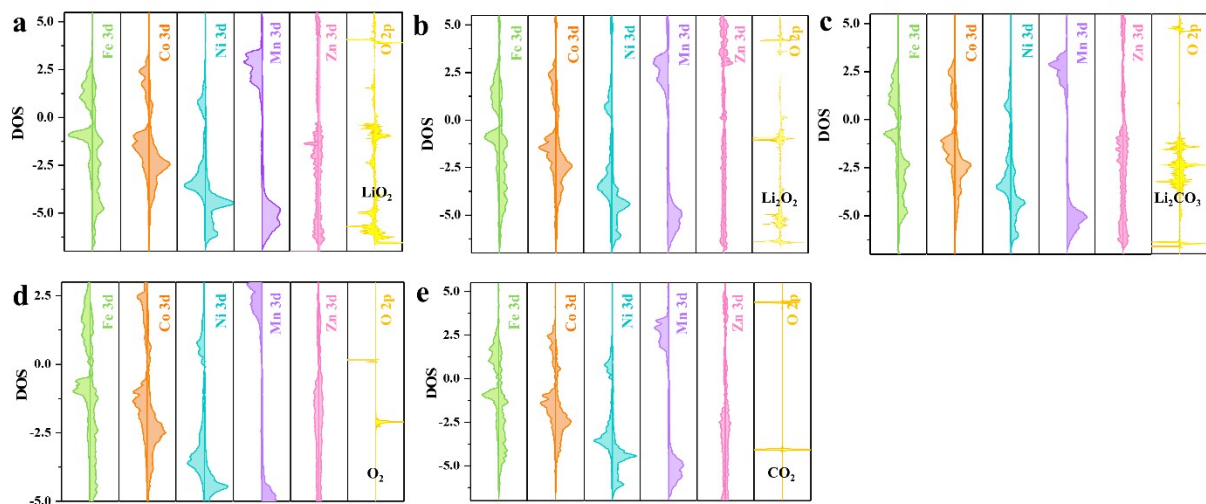

**Figure S24.** PDOS of metal's 3d orbitals and O 2p orbitals after adsorbed a)  $\text{LiO}_2$ , b)  $\text{Li}_2\text{O}_2$ , c)  $\text{Li}_2\text{CO}_3$ , d)  $\text{O}_2$  and e)  $\text{CO}_2$



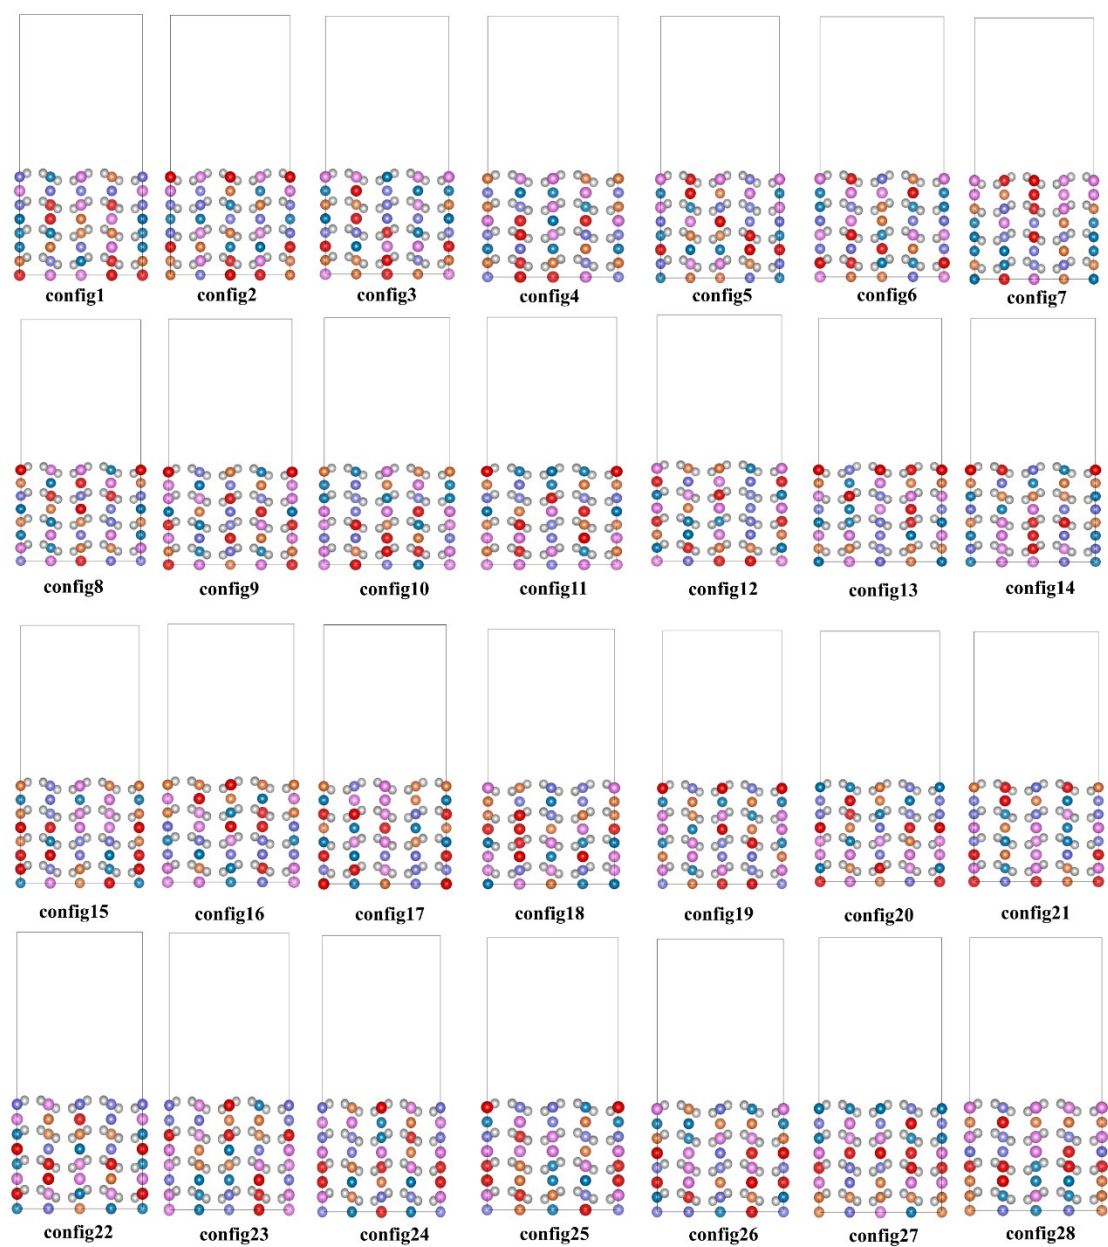

Figure S25. Calculated different configurations

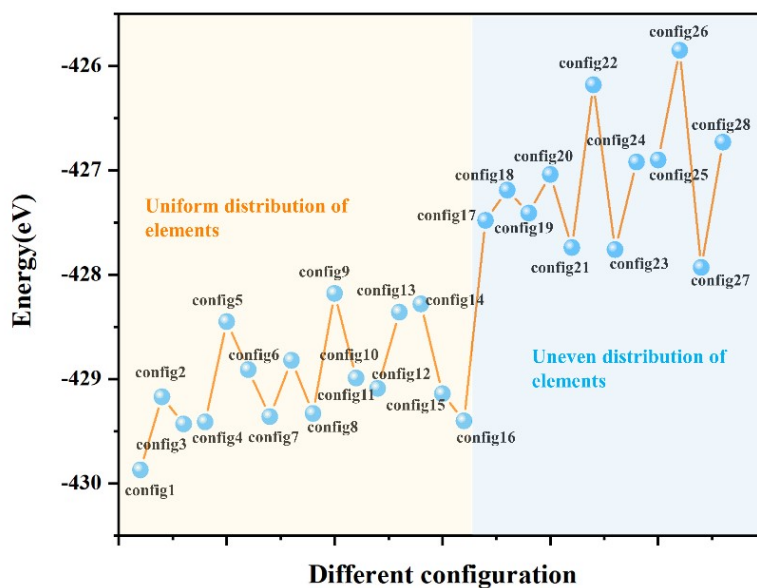

**Figure S26.** Calculated 28 configurations and corresponding surface energies

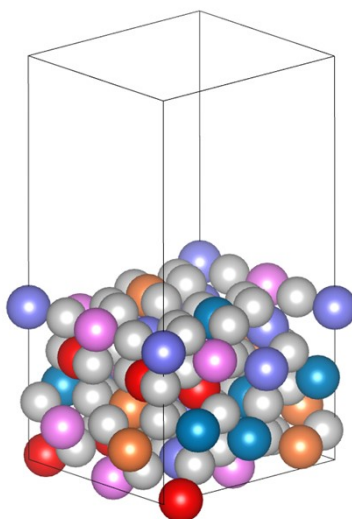

**Figure S27.** The structure model of config1

We constructed the HESe (210) plane model with a metal atom ratio of 1:1:1:1:1 for /Fe/Co/Ni/Mn/Zn. Due to the large number of possible configurations and limited computational resources, 28 representative configurations were selected for optimization. Elements in configurations 1-16 are relatively evenly distributed, resulting in lower calculated energies. Among them, configuration 1 has the lowest energy and is characterized by a slight surface excess of Co and no surface-exposed Mn. It can also be observed that the clustering of Co atoms seems to be beneficial for energy reduction and Mn plays an important role in stabilizing the HESe structure. Configurations 18-28 exhibit segregation of multiple elements, making the structures unstable and resulting in higher energies.

**Table S1. Comparison of the electrochemical performance of different electrodes using in Lithium-air battery<sup>4-20</sup>**

| Materials               | Assistance Strategy                                                             |                                                                 |                                           |                            |                                                                                                 | Cycle Performance         |                                          |                                                                                 | Ref                                        |              |
|-------------------------|---------------------------------------------------------------------------------|-----------------------------------------------------------------|-------------------------------------------|----------------------------|-------------------------------------------------------------------------------------------------|---------------------------|------------------------------------------|---------------------------------------------------------------------------------|--------------------------------------------|--------------|
|                         | Electrolyte                                                                     | Ionic liquid or Redox mediators additive                        | Li Anode                                  | Oxygen-selective membranes | circumstance                                                                                    | Mass(mg/cm <sup>2</sup> ) | Specific Capacity (mAh g <sup>-1</sup> ) | Current density (mA g <sup>-1</sup> ) / Limited Capacity (mAh g <sup>-1</sup> ) |                                            | Cycle Number |
| CNT-SS                  | Zeolite X                                                                       | LiTFSI in [C <sub>2</sub> C <sub>1</sub> im][NTf <sub>2</sub> ] |                                           |                            | Ambient air                                                                                     | 0.05                      | 12,020 (500 mA g <sup>-1</sup> )         | 500/500                                                                         | 309<br>162(with ionic liquid electrolytes) | 4            |
| MCNTs @MnO <sub>2</sub> | Commercial electrolyte                                                          | Co <sup>II</sup> -salen                                         |                                           |                            | dry air (21% O <sub>2</sub> , 78% N <sub>2</sub> ) without CO <sub>2</sub> and H <sub>2</sub> O | 0.3-0.5                   | 13050(500 mA g <sup>-1</sup> )           | 500/1000                                                                        | 300<br>60(only with catalyst)              | 5            |
| MoS <sub>2</sub>        | LiTFSI/DMSO                                                                     | EMIM-BF <sub>4</sub>                                            | Li <sub>2</sub> CO <sub>3</sub> /C-coated |                            | 79%N <sub>2</sub> , 21%O <sub>2</sub> , 500ppm. CO <sub>2</sub> RH=45%                          | 0.1                       |                                          | 500/500                                                                         | 550<br>11 (without anode-protection layer) | 6            |
| CNT                     | Commercial electrolyte                                                          | DBBQ and TEMPO                                                  |                                           | PSS-Li/GO-Li/GF            | Ambient air RH=25%                                                                              | 0.45 ± 0.1                |                                          | 0.2 mA cm <sup>-2</sup> /<br>0.2mAh cm <sup>-2</sup>                            | 486<br>100 (single-cathode)                | 7            |
| rGO                     | LiTFSI TEGDME gel polymer electrolyte containing LiI and 4 wt% SiO <sub>2</sub> | LiI                                                             | rGO protected Li anode                    | SiO <sub>2</sub> -LiI-GPE  | Ambient air RH=15%                                                                              | 0.8-1.0                   |                                          | 100/500                                                                         | 100<br>50(without LiI)                     | 8            |
| MnO                     | gel electrolyte                                                                 |                                                                 | LiEDA protected Li anode                  |                            | Ambient air RH=10-40%                                                                           | 0.4-0.5                   |                                          | 200/500                                                                         | 235<br>134 (with liquid electrolyte)       | 9            |
| Mo <sub>3</sub> P/TEMPO | LiTFSI/DMSO                                                                     | EMIM-BF <sub>4</sub> /TEMPO/DBBQ                                | Li <sub>2</sub> CO <sub>3</sub> /C-coated |                            | 78%N <sub>2</sub> , 21%O <sub>2</sub> , 500 ppm. CO <sub>2</sub> , RH=45%                       | 0.1                       |                                          | 500/500                                                                         | 1200<br>150 (without protection)           | 10           |
| 3DOS-Co@Mn@CC           | Gel Electrolyte                                                                 |                                                                 |                                           |                            | Ambient air RH=50%                                                                              | 0.63                      | 6500(500 mA g <sup>-1</sup> )            | 500/500                                                                         | 100                                        | 11           |

|                                                                                           |                                                                                          |           |           |           |                                             |            |                                     |                                                     |            |                  |
|-------------------------------------------------------------------------------------------|------------------------------------------------------------------------------------------|-----------|-----------|-----------|---------------------------------------------|------------|-------------------------------------|-----------------------------------------------------|------------|------------------|
| Gr-Co <sub>3</sub> O <sub>4</sub>                                                         | LiPF <sub>6</sub> in ethylene carbonate (EC) and diethyl carbonate (DEC)                 |           |           |           | Ambient air                                 | 0.325      |                                     | 160/200                                             | 50         | 12               |
| SWNT/IL CNG                                                                               | Li[NTf <sub>2</sub> ] and [C <sub>2</sub> C <sub>1</sub> im][NTf <sub>2</sub> ] solution |           |           |           | Ambient air                                 | 0.6        | 10730 (200)                         | 200/1000                                            | 10         | 13               |
| NiCo <sub>2</sub> O <sub>4</sub> @Ni                                                      | LiPF <sub>6</sub> /EC/DEC                                                                |           |           |           | Ambient air                                 | 1.0        |                                     | 0.5 mA cm <sup>-2</sup> /<br>1 mAh cm <sup>-2</sup> | 100        | 14               |
| Fe <sub>2</sub> Mo <sub>3</sub> O <sub>2</sub>                                            | Commercial electrolyte                                                                   |           |           |           | Ambient air                                 | 1.0        | 8000 (500 mA g <sup>-1</sup> )      | 500/600                                             | 157        | 15               |
| CoMoO <sub>4</sub>                                                                        | Commercial electrolyte                                                                   |           |           |           | Ambient air<br>RH<30%                       | 1.0        | 12000 (100 mA g <sup>-1</sup> )     | 500/600<br>1000/600                                 | 247<br>270 | 16               |
| RuO <sub>2</sub> /NiO                                                                     | Commercial electrolyte                                                                   |           |           |           | Ambient air<br>RH=65%                       | 0.075      | 3465 (250 mA g <sup>-1</sup> )      | 250/500                                             | 200        | 17               |
| SnO <sub>2</sub> @C                                                                       | Commercial electrolyte                                                                   |           |           |           | Ambient air                                 | 0.158      | 8339 (75 mA g <sup>-1</sup> )       | 75/1000<br>200/1000                                 | 31<br>25   | 18               |
| Fe@La <sub>0.6</sub> Sr <sub>0.4</sub> Co <sub>0.2</sub> Fe <sub>0.8</sub> O <sub>3</sub> | LiTFSI/DMSO                                                                              |           |           |           | Ambient air                                 | 1.0        | 14093(200 mA g <sup>-1</sup> )      | 400/500                                             | 156        | 19               |
| NiCo <sub>2</sub> O <sub>4</sub>                                                          | Commercial electrolyte                                                                   |           |           |           | Ambient air<br>(25°C CO <sub>2</sub> 0.03%) | 0.8        | 8019                                | 300/1000                                            | 40         | 20               |
| <b>HESe</b>                                                                               | <b>Commercial electrolyte</b>                                                            | <b>No</b> | <b>No</b> | <b>No</b> | <b>Ambient air</b>                          | <b>0.5</b> | <b>3650 (100 mA g<sup>-1</sup>)</b> | <b>500/500</b>                                      | <b>480</b> | <b>This work</b> |

**Table S2. Comparison of the electrochemical performance of different electrodes using in Lithium-CO<sub>2</sub> battery<sup>21-39</sup>**

| Materials                                | Electrolyte                                            | Mass(mg/cm <sup>2</sup> ) | Specific Capacity (mAh g <sup>-1</sup> ) | Current density (mA g <sup>-1</sup> ) / Limited Capacity (mAh g <sup>-1</sup> ) | Cycle Number | ref              |
|------------------------------------------|--------------------------------------------------------|---------------------------|------------------------------------------|---------------------------------------------------------------------------------|--------------|------------------|
| RuP <sub>2</sub> -NPCF                   | LiTFSI/TEGDME                                          | 0.15–0.25                 | 11951(100 mA g <sup>-1</sup> )           | 200/1000                                                                        | 200          | 21               |
| RuCo/CNFs                                | LiTFSI in DMSO                                         | 0.25                      | 17 270(300 mA g <sup>-1</sup> )          | 500/1000                                                                        | 90           | 22               |
| IrO <sub>2</sub> -N/CNT                  | LiTFSI in TEGDME                                       | 0.2–0.3                   | 4634(100 mA g <sup>-1</sup> )            | 100/400                                                                         | 316          | 23               |
| NiS <sub>2</sub> /FeS <sub>2</sub> -NSGA | LiTFSI in DMSO                                         | 0.25                      | 21,178(300 mA g <sup>-1</sup> )          | 1000/1000                                                                       | 127          | 24               |
| ZnCo <sub>2</sub> O <sub>4</sub> @CNTs   | LiTFSI in TEGDME                                       | 0.2                       | 4275(100 mA g <sup>-1</sup> )            | 100/500                                                                         | 200          | 25               |
| Co–N-CNTs                                | LiTFSI in TEGDME                                       |                           | 6042(200 mA g <sup>-1</sup> )            | 400/500                                                                         | 92           | 26               |
| Ir NSs-CNFs                              | LiTFSI in TEGDME                                       | 0.3                       | 7666.7(166.7 mA g <sup>-1</sup> )        | 500/1000                                                                        | 400          | 27               |
| MnO@NC-G                                 | LiTFSI in TEGDME                                       | 0.27-0.45                 | 25021(50 mA g <sup>-1</sup> )            | 1000/1000                                                                       | 200          | 28               |
| ZnS QDs/N-rGO                            | LiTFSI in TEGDME                                       | 0.2-0.5                   | 10310(100 mA g <sup>-1</sup> )           | 400/1000                                                                        | 400          | 29               |
| Co-Doped MnO <sub>2</sub>                | LiTFSI in TEGDME                                       | 0.5-0.8                   | 8203(100 mA g <sup>-1</sup> )            | 100/1000                                                                        | 500          | 30               |
| O <sub>v</sub> -TiO <sub>2</sub> /MXene  | LiTFSI in TEGDME                                       |                           | 18042.5(200 mA g <sup>-1</sup> )         | 200/1000                                                                        | 158          | 31               |
| N-CNTs@Ti                                | LiTFSI in TEGDME                                       | 0.45                      | 9292.3(50 mA g <sup>-1</sup> )           | 250/1000                                                                        | 45           | 32               |
| MoS <sub>2</sub> NFs                     | 0.1 M LiTFSI in (EMIM-BF <sub>4</sub> )/DMSO (25%/75%) | 0.1 ±0.002                | 60000(100 mA g <sup>-1</sup> )           | 500/500                                                                         | 500          | 33               |
| MoS <sub>2</sub> /CNT                    | LiTFSI in TEGDME                                       |                           | 8551(100 mA g <sup>-1</sup> )            | 100/500                                                                         | 142          | 34               |
| Fe-ISA/N,S-HG                            | 1 M LiTFSI 0.3 M LiNO <sub>3</sub> /DMSO               | 0.21                      | 23174(100 mA g <sup>-1</sup> )           | 1000/1000                                                                       | 210          | 35               |
| Cu–NG                                    | LiTFSI/TEGDME                                          | 0.27-0.44                 | 13 676(200 mA g <sup>-1</sup> )          | 200/1000                                                                        | 50           | 36               |
| BN-hG                                    | LiTFSI in TEGDME                                       | 0.3                       | 16033(300 mA g <sup>-1</sup> )           | 1000/1000                                                                       | 200          | 37               |
| B-NCNT                                   | LiTFSI in TEGDME                                       | 0.2                       | 23 328(50 mA g <sup>-1</sup> )           | 1000/1000                                                                       | 360          | 38               |
| Ir-Te NWs                                | LiNO <sub>3</sub> -DMSO                                | 0.4-0.6                   | 13,247.1(200 mA g <sup>-1</sup> )        | 1000/500                                                                        | 350          | 39               |
| <b>HESe</b>                              | <b>LiTFSI in TEGDME</b>                                | <b>0.5</b>                |                                          | <b>500/500</b>                                                                  | <b>1050</b>  | <b>This work</b> |

**Table S3. d-band center (eV) of each metal site in MSe<sub>2</sub> and HSe**

|                  | Fe    | Co    | Ni    | Mn    | Zn    |
|------------------|-------|-------|-------|-------|-------|
| MSe <sub>2</sub> | -1.17 | -2.57 | -4.41 | -3.98 | -8.54 |
| HSe              | -2.34 | -2.46 | -4.46 | -4.84 | -8.43 |

**Table S4. LiO<sub>2</sub> adsorption energy (eV) on metal sites in MSe<sub>2</sub> and HSe**

|                  | Fe    | Co    | Ni    | Mn    | Zn    |
|------------------|-------|-------|-------|-------|-------|
| MSe <sub>2</sub> | -1.26 | -0.56 | -0.87 | -1.26 | -0.61 |
| HSe              | -1.07 | -0.68 | -0.69 | -1.07 | -0.91 |

**Table S5. Structure models and corresponding adsorption energies of different adsorbed species on different adsorption sites of HESe (210) facet**

| Adsorption Sites                              | Fe                                                                                            | Co                                                                                            | Ni                                                                                            | Zn                                                                                             | Se                                                                                              |
|-----------------------------------------------|-----------------------------------------------------------------------------------------------|-----------------------------------------------------------------------------------------------|-----------------------------------------------------------------------------------------------|------------------------------------------------------------------------------------------------|-------------------------------------------------------------------------------------------------|
| sub- Li*<br>(eV)                              | 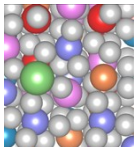<br>-1.401   | <br>-1.419   | <br>-0.977   | <br>-1.4567  | <br>-1.526   |
| sub- O <sub>2</sub> *<br>(eV)                 | <br>-0.940   | <br>-0.944   | <br>-0.943   | <br>-0.956   | <br>-0.942   |
| sub- LiO <sub>2</sub> *<br>(eV)               | <br>-1.070   | <br>-0.683   | <br>-0.490   | <br>-0.907   | <br>-0.665   |
| sub- Li <sub>2</sub> O <sub>2</sub> *<br>(eV) | <br>-1.510 | <br>-1.322 | <br>-1.618 | <br>-1.092 | <br>-1.551 |
| Sub- H <sub>2</sub> O*<br>(eV)                | <br>-0.054 | <br>0.076  | <br>-0.107 | <br>0.069  | <br>0.055  |

## References:

1. W. Zhong, C. Zhang, S. Li, W. Zhang, Z. Zeng, S. Cheng and J. Xie, *Science China Materials*, 2022, **66**, 903-912.
2. S. Ramesh and C.-W. Liew, *Measurement*, 2013, **46**, 1650-1656.
3. J. J. Xu, Z. W. Chang, Y. Wang, D. P. Liu, Y. Zhang and X. B. Zhang, *Advanced Materials*, 2016, **28**, 9620-9628.
4. X. Chi, M. Li, J. Di, P. Bai, L. Song, X. Wang, F. Li, S. Liang, J. Xu and J. Yu, *Nature*, 2021, **592**, 551-557.
5. X. Hu, J. Wang, Z. Li, J. Wang, D. H. Gregory and J. Chen, *Nano Letters*, 2017, **17**, 2073-2078.
6. M. Asadi, B. Sayahpour, P. Abbasi, A. T. Ngo, K. Karis, J. R. Jokisaari, C. Liu, B. Narayanan, M. Gerard, P. Yasaei, X. Hu, A. Mukherjee, K. C. Lau, R. S. Assary, F. Khalili-Araghi, R. F. Klie, L. A. Curtiss and A. Salehi-Khojin, *Nature*, 2018, **555**, 502-506.
7. Q. Han, W. Guo, X. He, T. Liu, X. Liu, X. Zhu, T. Bian, L. Jiang, J. Lu and Y. Zhao, *Joule*, 2022, **6**, 381-398.
8. Z. Guo, J. Li, Y. Xia, C. Chen, F. Wang, A. G. Tamirat, Y. Wang, Y. Xia, L. Wang and S. Feng, *Journal of Materials Chemistry A*, 2018, **6**, 6022-6032.
9. X. Lei, X. Liu, W. Ma, Z. Cao, Y. Wang and Y. Ding, *Angewandte Chemie International Edition*, 2018, **57**, 16131-16135.
10. A. Kondori, Z. Jiang, M. Esmailirad, M. Tamadoni Saray, A. Kakekhani, K. Kucuk, P. Navarro Munoz Delgado, S. Maghsoudipour, J. Hayes, C. S. Johnson, C. U. Segre, R. Shahbazian-Yassar, A. M. Rappe and M. Asadi, *Advanced Materials*, 2020, **32**.
11. J. Li, Z. Wang, L. Yang, Y. Liu, Y. Xing, S. Zhang and H. Xu, *ACS Applied Materials & Interfaces*, 2021, **13**, 18627-18637.
12. C. Sun, F. Li, C. Ma, Y. Wang, Y. Ren, W. Yang, Z. Ma, J. Li, Y. Chen, Y. Kim and L. Chen, *J. Mater. Chem. A*, 2014, **2**, 7188-7196.
13. T. Zhang and H. Zhou, *Angewandte Chemie International Edition*, 2012, **51**, 11062-11067.
14. L. Li, S.-H. Chai, S. Dai and A. Manthiram, *Energy & Environmental Science*, 2014, **7**.
15. Y. Qiu, G. Li, H. Zhou, G. Zhang, L. Guo, Z. Guo, R. Yang, Y. Fan, W. Wang, Y. Du and F. Dang, *Adv Sci (Weinh)*, 2023, **10**, e2300482.
16. H. Zhou, L. Guo, R. Zhang, L. Xie, Y. Qiu, G. Zhang, Z. Guo, B. Kong and F. Dang, *Advanced Functional Materials*, 2023, **33**.
17. P. Tan, Z. H. Wei, W. Shyy, T. S. Zhao and X. B. Zhu, *Energy & Environmental Science*, 2016, **9**, 1783-1793.
18. D. Mei, X. Yuan, Z. Ma, P. Wei, X. Yu, J. Yang and Z.-F. Ma, *ACS Applied Materials & Interfaces*, 2016, **8**, 12804-12811.
19. J. Cheng, Y. Jiang, M. Zhang, Y. Sun, L. Zou, B. Chi, J. Pu and L. Jian, *ChemCatChem*, 2018, **10**, 1635-1642.
20. L. Zou, Y. Jiang, J. Cheng, Y. Gong, B. Chi, J. Pu and L. Jian, *Electrochimica Acta*, 2016, **216**, 120-129.
21. Z. Guo, J. Li, H. Qi, X. Sun, H. Li, A. G. Tamirat, J. Liu, Y. Wang and L. Wang, *Small*, 2018, **15**.
22. Y. Jin, F. Chen and J. Wang, *ACS Sustainable Chemistry & Engineering*, 2020, **8**, 2783-2792.
23. G. Wu, X. Li, Z. Zhang, P. Dong, M. Xu, H. Peng, X. Zeng, Y. Zhang and S. Liao, *Journal of Materials Chemistry A*, 2020, **8**, 3763-3770.
24. Y. Jin, Y. Liu, L. Song, J. Yu, K. Li, M. Zhang and J. Wang, *Chemical Engineering Journal*, 2022, **430**.
25. S. Thoka, C.-J. Chen, A. Jena, F.-M. Wang, X.-C. Wang, H. Chang, S.-F. Hu and R.-S. Liu, *ACS applied materials & interfaces*, 2020, **12**, 17353-17363.



26. L. Song, T. Wang, C. Wu, X. Fan and J. He, *Chemical Communications*, 2019, **55**, 12781-12784.
27. Y. Xing, Y. Yang, D. Li, M. Luo, N. Chen, Y. Ye, J. Qian, L. Li, D. Yang, F. Wu, R. Chen and S. Guo, *Advanced Materials*, 2018, **30**.
28. S. Li, Y. Liu, J. Zhou, S. Hong, Y. Dong, J. Wang, X. Gao, P. Qi, Y. Han and B. Wang, *Energy & Environmental Science*, 2019, **12**, 1046-1054.
29. H. Wang, K. Xie, Y. You, Q. Hou, K. Zhang, N. Li, W. Yu, K. P. Loh, C. Shen and B. Wei, *Advanced Energy Materials*, 2019, **9**.
30. B. Ge, Y. Sun, J. Guo, X. Yan, C. Fernandez and Q. Peng, *Small*, 2019, **15**.
31. H. Wang, R. Zheng, C. Shu and J. Long, *ChemElectroChem*, 2020, **7**, 4922-4930.
32. Y. Li, J. Zhou, T. Zhang, T. Wang, X. Li, Y. Jia, J. Cheng, Q. Guan, E. Liu, H. Peng and B. Wang, *Advanced Functional Materials*, 2019, **29**.
33. A. Ahmadiparidari, R. E. Warburton, L. Majidi, M. Asadi, A. Chamaani, J. R. Jokisaari, S. Rastegar, Z. Hemmat, B. Sayahpour, R. S. Assary, B. Narayanan, P. Abbasi, P. C. Redfern, A. Ngo, M. Vörös, J. Greeley, R. Klie, L. A. Curtiss and A. Salehi-Khojin, *Advanced Materials*, 2019, **31**.
34. C.-J. Chen, C.-S. Huang, Y.-C. Huang, F.-M. Wang, X.-C. Wang, C.-C. Wu, W.-S. Chang, C.-L. Dong, L.-C. Yin and R.-S. Liu, *ACS Applied Materials & Interfaces*, 2021, **13**, 6156-6167.
35. C. Hu, L. Gong, Y. Xiao, Y. Yuan, N. M. Bedford, Z. Xia, L. Ma, T. Wu, Y. Lin, J. W. Connell, R. Shahbazian-Yassar, J. Lu, K. Amine and L. Dai, *Advanced Materials*, 2020, **32**.
36. Z. Zhang, Z. Zhang, P. Liu, Y. Xie, K. Cao and Z. Zhou, *Journal of Materials Chemistry A*, 2018, **6**, 3218-3223.
37. L. Qie, Y. Lin, J. W. Connell, J. Xu and L. Dai, *Angewandte Chemie International Edition*, 2017, **56**, 6970-6974.
38. X. Li, J. Zhou, J. Zhang, M. Li, X. Bi, T. Liu, T. He, J. Cheng, F. Zhang, Y. Li, X. Mu, J. Lu and B. Wang, *Advanced Materials*, 2019, **31**.
39. Y. Zhai, H. Tong, J. Deng, G. Li, Y. Hou, R. Zhang, J. Wang, Y. Lu, K. Liang, P. Chen, F. Dang and B. Kong, *Energy Storage Materials*, 2021, **43**, 391-401.
